# Supplementary material
Source: publisher site journal article supplement (https://www.dovepress.com/article/579511)
Supplement: Supplementary file 1 [file 579511_Supplementary%20Information_1.docx]

**Supplementary Material 1: Summary of Included Evidence**

| Category | | Evidence Description | Evidence Level | Recommendati-on Grade |
| --- | --- | --- | --- | --- |
| Symptom Experience |  | 1. Conduct a comprehensive medical assessment within 24-48 hours of stroke onset, including cognition, vision, hearing, muscle tone, strength, sensation, and balance. | 4b | A |
|  | 2. Consider transition planning issues during the initial assessment period (e.g., initiating transition and discharge planning upon admission). | 4b | A |
|  | 3. Use standardized, validated assessment tools (e.g., NIHSS, Barthel Index, FIM, SSS, ESS, China Stroke Scale (1995), BBS, MAS, MRC, etc.) to comprehensively evaluate impairments, activity limitations, participation restrictions, and environmental factors. | 4b | A |
|  | 4. Assess the risk of adverse events (e.g., fall risk) during hospitalization. | 4b | A |
|  | 5. Clinical nurses use the Braden Scale to assess pressure ulcer risk in stroke patients. | 4b | A |
| Symptom Management Strategies | Management Personnel | 6. Symptom assessment and management should be implemented by specialists such as consultant physicians, nurses, and rehabilitation therapists specializing in stroke or rehabilitation medicine. | 4b | A |
| Timing & Intensity | 7. Frequent out-of-bed activities are generally not recommended in the hyperacute phase (within 24 hours of stroke onset). Mobilization may be reasonable for some hyperacute stroke patients, but clinical judgment should be applied. | 1a | B |
| 8. Acutely ill patients without contraindications (e.g., post-interventional arterial puncture, hemodynamic instability, low oxygen saturation, lower limb fractures/injuries) should start mobilization as early as possible (between 24 and 48 hours after stroke onset). | 1a | B |
| 9. Stroke patients should receive any necessary therapy at least 5 days per week. However, rehabilitation should be provided at an appropriate intensity and duration, individually designed to meet needs for optimal recovery and tolerance. | 2a | A |
| 10. When conditions permit, begin with at least 45 minutes of rehabilitation training daily, providing over 2.5 hours of physical rehabilitation per week. | 2a | A |
| Mobility & Function Management | 11. Bedridden stroke patients with paralysis should be positioned in therapeutic postures every 1-2 hours. | 4b | A |
| 12. Bedridden stroke patients with paralysis should maintain passive/active-assisted range of motion exercises for limb joints, taking care to protect the affected limb and avoid mechanical damage. | 4b | B |
| 13. After stabilization, stroke patients with paralysis should progressively transition from lying to sitting to standing with the help of nursing/rehabilitation staff, with attention to safety. | 4b | B |
| 14. During the acute phase, emphasis should be placed on strength training for paralyzed limbs, using progressive resistance training for relevant muscles. Isokinetic strength training can improve function in paralyzed limbs. | 1a | B |
| 15. Implement mirror therapy for approximately 30 minutes per session, at least 5 times per week over a 4-week period. | 1c | A |
| 16. Provide functional electrical stimulation, neuromuscular electrical stimulation, or transcutaneous electrical nerve stimulation as an adjunct therapy to improve muscle strength and function in paralyzed limbs. | 2c | B |
| 17. Assess stable, ambulatory post-stroke patients to provide cardiopulmonary fitness training and resistance training aligned with their personal goals. | 2a | A |
| 18. Implement circuit training programs to promote balance and gait recovery. | 1a | A |
| 19. When overground walking training is not possible or appropriate, treadmill-based gait training (with or without body weight support) can be used to improve walking speed and distance. | 1a | A |
| 20. Guide patients in aerobic exercises (e.g., Tai Chi, Baduanjin) to improve muscle strength, endurance, coordination, flexibility, and balance-gait function. Recommended: 30 min/session, 1 session/day, 3-5 sessions/week, for over 4 weeks. | 2a | B |
| 21. Implement repetitive, progressively adjusted task-oriented and goal-oriented training to improve performance in specific lower-limb tasks such as walking distance, speed, and sit-to-stand transfers. | 1a | A |
| 22. Initiate walking training when patients have increased lower limb weight-bearing capacity. Gradually, patients progress to training involving obstacle crossing and stair climbing/descending. | 4b | A |
| 23. Improve gait performance, dynamic postural stability, stride length, and cadence by providing stable rhythmic auditory cueing (e.g., music or metronome) during movement. | 1a | A |
| 24. Acupuncture can better improve balance in stroke patients. | 2a | A |
| 25. Clarify to medical staff and patients that hydrotherapy utilizes water's physical properties (density, buoyancy) to partially support body weight, reduce lower limb load, decrease ground reaction forces, and promote early balance and walking recovery. | 1a | B |
| 26. Incorporate virtual reality technology during balance, gait, and upper limb functional recovery training to enhance outcomes. | 1a | A |
| 27. Provide wrist and hand splints for post-stroke patients with non-functional hands to maintain joint range of motion, soft tissue length, joint alignment, and increase passive range. | 4c | A |
| 28. Consider Constraint-Induced Movement Therapy (CIMT) for post-stroke patients with wrist extension ≥20° and finger extension ≥10°. Monitor for potential adverse events (e.g., falls, low mood, fatigue). | 1b | A |
| 29. Training should encourage the use of the affected limb during functional tasks and be designed to simulate part or all of the skills required for daily living activities (e.g., folding, buttoning, pouring, lifting). | 1a | A |
| 30. After assessment to determine suitability, encourage patients to use mental imagery training to promote sensorimotor recovery of the arm. | 1c | A |
| 31. During the subacute and chronic recovery phases, consider strength training for patients with mild to moderate impairment, as it does not exacerbate muscle tone or pain. | 1a | A |
| 32. Encourage patients to play musical instruments to improve hand function. | 1c | B |
| 33. Ankle-foot orthoses are used for post-stroke patients with foot clearance issues in the swing phase, stance phase control problems affecting walking, and foot drop. | 3c | A |
|  | Psychological Support | 34. Use positive language to encourage patients, building their confidence and enhancing self-efficacy. | 4b | A |
|  | 35. Establish a good nurse-patient relationship, clarify patient needs, help patients correctly understand the disease and the benefits of exercise for symptom improvement, and correct their disease-related beliefs. | 3a | A |
|  | 36. Use music therapy to relax stroke patients' mood and improve their motivation and compliance. | 1c | B |
|  | Health Education | 37. Provide care training (e.g., how to move patients and assist with dressing) for willing and able family members and caregivers supporting the post-stroke individual. | 4b | A |
|  | 38. Provide education and health information to patients, families, and caregivers, including disease knowledge, treatment plans, and medication side effects, to enhance their understanding of stroke, common comorbidities, and stroke rehabilitation management. | 3a | A |
|  | 39. Provide health education to stroke patients to increase their awareness of changes in their health status, participation initiative, and rehabilitation confidence, thereby improving overall rehabilitation quality. | 3a | B |
|  | 40. Conduct motivational interviewing and personalized education for patients to identify individual risk factors, which may be beneficial for long-term stroke risk factor control. | 3a | B |
|  | 41. Prevent pressure ulcers through proper positioning, scheduled turning, use of air mattresses and foam pads, timely cleaning after toileting, and improving overall nutritional status. | 4b | B |

**Supplementary Material 2: Expert Consultation Questionnaire**

Dear Expert,

Hello! I am Zhou Jialing, a nursing postgraduate student at the School of Medicine, Jishou University, under the supervision of Professor Li Jinxiu and Professor Tan Jianghong. It is a great honor to invite you to serve as a consulting expert for our research project .Your professional guidance and suggestions will play a crucial role in the smooth progress of this project! Below, I will report on the main research content:

Stroke, also known as apoplexy, is caused by various factors leading to damage to local or overall brain tissue and is characterized by five major features. According to "The Global Burden of Stroke and Its Risk Factors Report," stroke is the second leading cause of death and the third leading cause of disability worldwide. It is also the primary cause of adult death and disability in China, with the number of deaths due to stroke continuing to increase significantly each year. Stroke patients have a high incidence of symptoms involving multiple systems. Studies indicate that, on average, each stroke patient experiences more than ten symptoms that occur sequentially or simultaneously and have a synergistic effect, severely affecting patients' daily living abilities and quality of life and hindering their later recovery. In recent years, with the comprehensive advancement of China's medical and health system reform, healthcare professionals have increasingly focused on the identification and management of stroke patients' symptoms, continuously exploring the symptoms that have the most significant impact on patients to facilitate precise interventions, alleviate patients' symptom burden, and improve their survival levels and recovery outcomes. However, most research focuses on the individual analysis and resolution of stroke patients' symptoms, often overlooking the complex relationships among multiple symptoms in patients themselves. Consequently, several researchers have conducted conceptual analyses of symptom clusters composed of multiple symptoms, which has improved the initial single-mindedness of identifying and managing individual symptoms, making symptom analysis more holistic and better expressing the incidence, severity, and distress levels of symptoms. Subsequently, researchers proposed applying network analysis methods to symptom clusters research to identify the primary influencing symptoms, clarify the relationships among symptoms, and recognize core symptom clusters within the network. This approach enables nursing staff to intervene more precisely in symptom management, reduce treatment burden, alleviate patients' discomfort, and improve patient satisfaction.

This study is based on the "Symptom Management Theory Model," which includes three parts: symptom experience, symptom management strategies, and symptom management outcomes. We applied this model to the management of core symptom clusters in stroke patients. By identifying the core symptom clusters that occur in stroke patients during hospitalization, we developed corresponding strategies for prevention and management to reduce the occurrence of symptoms and alleviate their severity and distress. For this research, we conducted a preliminary questionnaire survey to determine the core symptom clusters in hospitalized patients as somatic activity symptom clusters. We then extensively reviewed relevant literature for evidence summarization. After discussions within the research team, we initially formulated a management plan for core symptom clusters in stroke patients. To develop a more valuable plan, we plan to conduct two rounds of Delphi expert consultations to guide us in further revising and improving it.

This consultation questionnaire consists of the following three parts: Part I: Expert Basic Information Questionnaire; Part II: Management Plan for Core Symptom Clusters in Hospitalized Stroke Patients; Part III: Expert's Judgment Basis and Familiarity Level.

Thank you for taking the time to provide guidance and assistance for this project, offering a more academic, standardized, and authoritative basis. Please evaluate each item in the questionnaire one by one and write your opinions directly in the consultation form. If possible, we would greatly appreciate it if you could reply to the consultation form within one week after receiving this email (this study requires two rounds of consultations). If you have any questions, please feel free to call or send an email. For research purposes, all content in the consultation form is solely used for research analysis and will not be used for any other purposes.

Finally, thank you again for your guidance and suggestions on this study. We wish you success in your work and happiness in your life!

Contact Person: Jialing Zhou
Email:1207949242@qq.com

Part I: Expert Basic Information Questionnaire

Instructions for Filling Out the Form:
Experts are requested to fill in their personal information. We will use your personal data solely for research analysis and will keep it strictly confidential. Please fill in your personal information or mark the appropriate options with a "√."

Table 1: Expert Basic Information Questionnaire

| Name |  | Gender |  | Age |  | Educational Background |  |
| --- | --- | --- | --- | --- | --- | --- | --- |
| Position |  | Professional Title |  | Years of Working Experience | |  | |
| Region |  | Working Department |  | Current Primary Role | | ☐Nursing Management  ☐Rehabilitation Therapist  ☐Rehabilitation Nursing  ☐Clinical Physician ☐ Clinical Nurse  ☐ Other | |
| Do you serve as a supervisor for master's and doctoral students? | ☐ Yes ☐ No | | | | | | |
| Phone Number |  | | | | | | |
| Email Address |  | | | | | | |
| Work Unit |  | | | | | | |

Part II: Management Plan for Core Symptom Clusters in Hospitalized Stroke Patients

Instructions for Filling Out the Form:

1. The following includes three tables, which are the primary, secondary, and tertiary items of the management plan, respectively.
2. Please judge the importance and feasibility of each item. Very Important = 5, Important = 4, Moderately Important = 3, Slightly Important = 2, Not Important = 1. Please mark a "√" in the corresponding column.
3. If you believe that the wording of an item is unclear, inaccurate, can be deleted, or does not belong to its respective dimension, please provide your suggestions in the "Modification Suggestions" column.
4. Based on your experience and knowledge, if you believe we have overlooked certain items, please supplement them in the "Suggested Additional Items" column, briefly explain the reasons, and judge their importance. Please do not omit or leave any items blank. Thank you for your cooperation!

Table 2: Primary Items of the Management Plan

| Primary Item | Importance | | | | | Deletion or Modification Suggestions |
| --- | --- | --- | --- | --- | --- | --- |
| Very Important = 5 | Important = 4 | Moderately Important = 3 | Slightly Important = 2 | Not Important = 1 |
| 1.Symptom Experience |  |  |  |  |  |  |
| 2.Symptom Management Strategies |  |  |  |  |  |  |
| 3.Symptom Management Outcomes |  |  |  |  |  |  |
| Items to be Added |  | | | | | |

Table 3: Secondary Items of the Management Plan

| Primary Item | Secondary Item | Importance | | | | | Deletion or Modifica-tion Suggesti-ons |
| --- | --- | --- | --- | --- | --- | --- | --- |
| Very Important = 5 | Important = 4 | Moderately Important = 3 | Slightly Important = 2 | Not Impor-tant = 1 |
| 1.Symptom Experience | 1.1 Symptom Perception |  |  |  |  |  |  |
| 1.2 Symptom Assessment |  |  |  |  |  |  |
| 1.3 Symptom Response |  |  |  |  |  |  |
| Items to be Added |  | | | | | | |
| 2.Symptom Management Strategies | 2.1 Target Personnel & Staff |  |  |  |  |  |  |
| 2.2 Management Setting |  |  |  |  |  |  |
| 2.3 Timing & Intensity |  |  |  |  |  |  |
| 2.4 Delivery Mode |  |  |  |  |  |  |
| 2.5 Functional Activity Management |  |  |  |  |  |  |
| 2.6 Health Education |  |  |  |  |  |  |
| 2.7 Psychological Support |  |  |  |  |  |  |
| Items to be Added |  | | | | | | |
| 3.Symptom Management Outcomes | 3.1 Functional Recovery |  |  |  |  |  |  |
| 3.2 Self-Efficacy |  |  |  |  |  |  |
| 3.3 Satisfaction |  |  |  |  |  |  |
| Items to be Added |  | | | | | | |

Table 4: Tertiary Items of the Management Plan

| Primary Item | Secondary Item | Tertiary Item | Importance | | | | | Deletion or Modification Suggestio-ns |
| --- | --- | --- | --- | --- | --- | --- | --- | --- |
| Very Importa-nt = 5 | Importa-nt = 4 | Moderat-ely Important = 3 | Slightly Importa-nt = 2 | Not Importa-nt = 1 |
| 1.Sympto-m Experien-ce | 1.1 Symptom Perception | 1.1.1 Understand the patient's basic condition based on their chief complaint. |  |  |  |  |  |  |
| 1.2 Symptom Assessment | 1.2.1 Conduct a comprehensive medical assessment for post-stroke individuals within 24-48 hours of admission, including cognition, vision, hearing, muscle tone, strength, sensation, and balance. |  |  |  |  |  |  |
| 1.2.2 Standardized assessment scales for stroke patients upon admission: National Institutes of Health Stroke Scale (NIHSS); VTE Risk Assessment Scale; Braden Scale for Predicting Pressure Sore Risk; Morse Fall Scale; and Barthel Index. |  |  |  |  |  |  |
| 1.2.3 Conduct overall motor function assessment using Brunnstrom Stages, Fugl-Meyer Assessment Scale, Manual Muscle Testing, and Berg Balance Scale. |  |  |  |  |  |  |
| 1.2.4 Consider issues related to transition planning during the initial assessment period (e.g., initiating transition and discharge planning upon admission). |  |  |  |  |  |  |
| 1.3 Symptom Response | 1.3.1 Observe for the presence of adverse emotions and the degree of symptom distress during communication with stroke patients. |  |  |  |  |  |  |
| 1.3.2 Use scales such as the GAD-7 for anxiety and PHQ-9 for depression for assessment. |  |  |  |  |  |  |
| Items to be Added |  |  | | | | | | |
| 2.Sympto-m Managem-ent Strategies | 2.1 Target Personnel & Staff | 2.1.1 Implementation Target: Patients, family members, and caregivers. |  |  |  |  |  |  |
| 2.1.2 Implementation Personnel: Doctors specializing in stroke or rehabilitation medicine, nurses, brain-heart health managers, rehabilitation therapists. |  |  |  |  |  |  |
| 2.2 Management Setting | 2.2.1Hospital wards and rehabilitation therapy rooms. |  |  |  |  |  |  |
| 2.3 Timing & Intensity | 2.3.1 Intervention Timing: Acutely ill patients without contraindications (e.g., post-interventional arterial puncture patients, hemodynamically unstable patients, patients with low oxygen saturation, and patients with lower limb fractures or injuries) should start mobilization as early as possible (between 24 and 48 hours after stroke onset). |  |  |  |  |  |  |
| 2.3.2 Intervention Intensity: When conditions permit, begin with at least 45 minutes of rehabilitation training daily during the initial phase, providing over 2.5 hours of physical rehabilitation per week. Alternatively, stroke patients should receive any necessary therapy at least 5 days per week. However, rehabilitation therapy should be provided at an appropriate intensity and duration, individually designed to meet the patient's needs for optimal recovery and tolerance levels. |  |  |  |  |  |  |
| 2.4 Delivery Mode | 2.4.1 Face-to-Face Management Methods: ① Collaboratively make decisions and develop rehabilitation plans with patients, families, or caregivers. ② Guide patients in self-management based on individualized plans. ③ Conduct weekly centralized patient education sessions (using PPT lectures). |  |  |  |  |  |  |
| 2.4.2 Online Management Methods: Establish WeChat group chats, regularly push evidence-based health education materials, and provide real-time online professional consultation to answer patient questions. |  |  |  |  |  |  |
| 2.5 Functional Activity Management | 2.5.1 Brunnstrom-Ⅰ：① Therapeutic Positioning: Change positions every 1-2 hours (alternating among healthy side-lying, affected side-lying, and supine positions). Maintain shoulder extension and avoid compression on the affected side when lying on it. ② Prevention of Contractures: Wear wrist and hand splints (to maintain joint range of motion and soft tissue length); wear anti-foot-drop orthoses when bedridden (maintain ankle in neutral position, 2 hours per session). ③ Passive Joint Range of Motion: Perform passive training (healthy side assisting affected side for upper limb), avoiding mechanical damage; perform passive movements for fingers and wrist joints. |  |  |  |  |  |  |
| 2.5.2 Brunnstrom-Ⅱ：① Progressive Position Transitions: Continue therapeutic positioning, increase time spent lying on the affected side; perform supine-to-sit transfers with assistance. ② Advanced Joint Training: Adjust splints based on hand condition, attempt weak active-assisted grasp; continue passive ankle joint training, adding active-assisted components (patient attempts slight dorsiflexion). ③ Active-Assisted Training: Low-intensity active-assisted training (e.g., healthy side slowly extending the affected upper limb); encourage patients to participate in simple active movements (e.g., turning head independently). ④ Balance Training: Initiate sitting balance training (maintain sitting posture with assistance, slight trunk sway). ⑤ Assistive Technologies and Devices: Begin functional electrical stimulation and acupuncture therapy. |  |  |  |  |  |  |
| 2.5.3 Brunnstrom-Ⅲ：① Muscle Strength and Motor Control: Strengthen resistance training (targeting antagonist muscles of spastic muscles, e.g., upper limb extensors, lower limb flexors); guide patient to independently complete sit-to-stand transfer (gradually increasing weight-bearing on affected side); initiate mirror therapy (30 minutes daily, ≥5 times per week). ② Joint Training: Initiate active-assisted ankle dorsiflexion training (reducing influence of synergistic movement). ③ Hand Function: Conduct functional task training (e.g., grasping a small ball, pushing objects). ④ Gait-Balance Training: Initiate early standing balance training (bilateral weight-bearing, assisted weight shifting side-to-side) and gait training (assisted stepping after increased weight-bearing on affected lower limb); use rhythmic music/single-beat cues to improve cadence and stride length; implement group circuit training. ⑤ Assistive Technologies and Devices: Employ functional electrical stimulation combined with ankle-foot orthosis (to optimize ankle position); combine with acupuncture therapy. |  |  |  |  |  |  |
| 2.5.4 Brunnstrom-Ⅳ：① Muscle Strength and Partial Isolated Movement: Implement isokinetic strength training (core muscles and major muscles of the affected limb). ② Joint Training: Guide patient to independently perform active ankle dorsiflexion training. ③ For Patients with Hand Dysfunction (wrist extension ≥20°, finger extension ≥10°): Apply Constraint-Induced Movement Therapy (restrict healthy side), conduct activities of daily living training (e.g., buttoning clothes, folding laundry). ④ Gait and Complex Movements: Task-oriented training (stepping over obstacles, ascending/descending stairs, progressively); treadmill-based gait training (with no/partial body weight support); attempt hydrotherapy (using buoyancy to improve gait coordination). ⑤ Dynamic Balance Training: Implement dynamic balance training (e.g., walking on different surfaces, brief unilateral weight-bearing); apply specific task-oriented physical therapy techniques incorporating sensory stimulation. ⑥ Assistive Technologies and Devices: Use neuromuscular electrical stimulation to assist in strengthening isolated movements (e.g., independent upper limb extension); apply acupuncture therapy to assist in promoting functional recovery; use virtual reality technology to assist in functional rehabilitation. |  |  |  |  |  |  |
| 2.5.5 Brunnstrom-Ⅴ：① Full Isolation and Complex Tasks: High-intensity resistance training (e.g., quadriceps of the affected lower limb); complete complex tasks with the affected upper limb (e.g., dressing, washing face). ② Gait and Cardiopulmonary Integration: Improve gait quality (increase speed, distance); conduct complex environmental walking training (uneven surfaces, crowds), integrating cardiopulmonary function training with walking. ③ Hand Function Refinement: Grip and pinch strength training (e.g., squeezing stress balls, using tools); improve finger dexterity and coordination through musical instrument playing; mental imagery training (strengthening motor control through visualization). ④ Balance and Coordination Enhancement: Implement force platform biofeedback training (optimizing center of gravity control); practice medical exercise forms like Tai Chi and Baduanjin. ⑤ Immersive Training: Virtual reality training (simulating complex daily activity scenarios). |  |  |  |  |  |  |
| 2.6 Health Education | 2.6.1 Conduct motivational interviewing and provide personalized education for patients to identify individual risk factors and guide them in controlling risk factor progression. |  |  |  |  |  |  |
| 2.6.2 Provide education and health information, including disease knowledge, treatment plans, and medication side effects, to enhance their understanding of stroke, common comorbidities, and stroke rehabilitation management. |  |  |  |  |  |  |
| 2.6.3 Provide nursing training and health information for family members and caregivers supporting stroke patients. Prevent pressure ulcers through proper positioning, scheduled turning, use of air mattresses and foam pads, timely cleaning after toileting, and improving overall nutritional status, thereby boosting patient and family confidence in rehabilitation. |  |  |  |  |  |  |
| 2.6.4 Educate on in-hospital fall prevention (e.g., raise bed rails when in bed to prevent falls; follow the "Three-Step Getting Up Method" when rising to prevent orthostatic hypotension; for patients with muscle strength ≤ grade 3, clearly prohibit independent turning, sitting up, or getting out of bed, hang "Fall Risk" signs at the bedside, and ensure 24-hour dedicated care by family/caregivers). |  |  |  |  |  |  |
| 2.7 Psychological Support | 2.7.1 Use positive language to encourage patients, building their confidence and enhancing self-efficacy. |  |  |  |  |  |  |
| 2.7.2 Establish a good nurse-patient relationship, clarify patient needs, help patients correctly understand the disease and the benefits of exercise for symptom improvement, and correct their disease-related beliefs. |  |  |  |  |  |  |
| 2.7.3 Use music therapy to relax stroke patients' mood and improve their motivation and compliance. |  |  |  |  |  |  |
| Items to be Added |  |  | | | | | | |
| 3.Sympto-m Managem-ent Outcome-s | 3.1 Functional Recovery | 3.1.1 Barthel Index. |  |  |  |  |  |  |
| 3.1.2 Muscle Strength Grading. |  |  |  |  |  |  |
| 3.2 Self-Efficacy | 3.2.1 Assess stroke patients' self-efficacy (e.g., using the Stroke Self-Efficacy Questionnaire (SSEQ)). |  |  |  |  |  |  |
| 3.3 Satisfaction | 3.3.1 Stroke Patient Inpatient Satisfaction Evaluation Form. |  |  |  |  |  |  |
| Items to be Added |  |  | | | | | | |

**Supplementary Material 3: Expert Opinion**

**First Round Revisions**

(1) An expert suggested adding "to enhance sensory input for spasticity inhibition" to the description of "increase time lying on the affected side" under item 2.5.2 "Progressive Position Transitions." After discussion, this suggestion was adopted.

(2) An expert suggested adding an evaluation of family participation to the symptom management outcomes. This was adopted after discussion, leading to the addition of a secondary indicator "Family Participation Evaluation" and a tertiary indicator "Decisional Engagement Scale (DES-10)."

(3) An expert noted that the primary participants for "prevent pressure ulcers through proper positioning, scheduled turning, use of air mattresses and foam pads, timely cleaning after toileting, and improving overall nutritional status" are healthcare professionals. Therefore, they suggested deleting this content and modifying the indicator to "provide nursing training for family members and caregivers supporting stroke patients (e.g., guiding them on positioning bedridden patients, scheduled turning every 2 hours, and how to assist with limb movement)." After discussion, this was adopted.

(4) Experts suggested standardizing the language for "Standardized admission assessment scales for stroke patients (NIHSS; VTE Risk Assessment Scale; Pressure Ulcer Risk Assessment Scale; Morse Fall Scale; Barthel Index)" and item 1.2.3 ("overall motor function assessment using Brunnstrom Stages, Fugl-Meyer Assessment Scale, Manual Muscle Testing, Berg Balance Scale"), and adding explanatory notes below the table. After discussion, this was adopted.

(5) An expert suggested changing the "Morse Fall Scale" to the more clinically common "Johns Hopkins Fall Risk Assessment Scale." After discussion, this was adopted.

(6) An expert suggested specifying the exercise sets/repetitions for items like "Passive joint range of motion" under 2.5.1 (e.g., "passive finger and wrist movements, ankle dorsiflexion-eversion: 20 reps/set, 4 sets/day"). After discussion, this was adopted.

(7) An expert indicated that wrist and hand splints are inferior to orthoses. Splints are functionally limited, position-specific, prone to causing pressure ulcers, and less effective. They recommended using orthoses instead. After discussion, this was adopted.

(8) An expert found the phrasing of "if no contraindications (e.g., post-interventional arterial puncture patients, hemodynamically unstable patients, patients with low oxygen saturation, and patients with lower limb fractures or injuries) in acute patients, mobilization should start as early as possible (between 24 and 48 hours after stroke onset)" to be lengthy. They suggested revising it to "Stroke patients without contraindications (e.g., post-surgery/arterial puncture, hemodynamic instability, low oxygen saturation, lower limb fracture/injury) may begin mobilization within 24-48 hours of onset, provided they are clinically stable." After discussion, this was adopted.

(9) An expert found the phrasing for item 2.3.2 "When conditions permit, begin with at least 45 minutes of rehabilitation training daily, providing over 2.5 hours of physical rehabilitation per week. Alternatively, stroke patients should receive any necessary therapy at least 5 days per week. However, rehabilitation therapy should be provided at an appropriate intensity and duration, individually designed to meet the patient's needs for optimal recovery and tolerance levels" to be overly wordy. They suggested simplifying it to "In the initial phase, provide at least 45 minutes of rehabilitation training daily, with over 2.5 hours of physical rehabilitation per week, or provide planned therapy for at least 5 days per week, with specific plans adjusted according to individual circumstances." After discussion, this was adopted.

(10) An expert suggested dividing item 2.5.2 "Advanced Joint Training: Adjust splints based on hand condition, attempt weak active-assisted grasp; continue passive ankle joint training, adding active-assisted components (patient attempts slight dorsiflexion)" into separate items: "Ankle Training: Continue passive ankle training, adding active-assisted components (patient attempts slight dorsiflexion)" and "Hand Function: Adjust splints based on hand condition, attempt weak active-assisted grasp." After discussion, this was adopted.

(11) An expert suggested rephrasing "Joint Training: Initiate active-assisted ankle dorsiflexion training (reducing influence of synergistic movement)" under item 2.5.3 to "Ankle Training: Initiate active-assisted ankle dorsiflexion training (reducing influence of synergistic movement)." After discussion, this was adopted.

(12) An expert suggested rephrasing "Joint Training: Guide patient to independently perform active ankle dorsiflexion training" under item 2.5.4 to "Ankle Training: Guide patient to independently perform active ankle dorsiflexion training." After discussion, this was adopted.

(13) An expert suggested changing "For Patients with Hand Dysfunction..." under item 2.5.4 to the consistent subheading "Hand Function." After discussion, this was adopted.

(14) An expert pointed out redundancy in the phrasing "Consider transition planning issues during the initial assessment period (e.g., initiating transition and discharge planning upon admission)." They suggested simplifying it to "Conduct transition and discharge planning assessment during the initial evaluation." After discussion, this was adopted.

(15) An expert noted that item 2.5.5 "Balance and Coordination Enhancement" omitted the duration for medical exercises (e.g., Tai Chi, Ba duan jin). They suggested adding "30 min/session, 1 session/day." After discussion, this was adopted.

(16) An expert suggested revising the instruction in item 2.6.4 regarding patients with muscle strength ≤ grade 3 being prohibited from self-turning in a bed with side rails. They proposed modifying it to state that for patients with muscle strength below grade 3, self-turning is encouraged when family/caregivers are present, with the family/caregiver managing related situations (e.g., incorrect limb positioning unnoticed by the patient). After discussion, this was adopted.

**Second Round Revisions**

(1) An expert suggested adding "with the primary goal of reducing muscle tone and promoting isolated movement" to the description under item 2.5.3 "Muscle Strength and Motor Control" to clarify the method and objective. After discussion, this was adopted.

(2) An expert suggested adding specific durations for different intervention types under "Intervention Intensity": exercise therapy (20-30 min), physical agent modalities (20-60 min), occupational therapy (20-30 min), and traditional Chinese medicine rehabilitation (20-30 min). After discussion, this was adopted.

(3) An expert pointed out that the "Online Management Methods" (WeChat groups) might not be accessible to patients who don't use WeChat. They suggested revising it to "Online Management Methods: Push evidence-based health education materials and provide consultation via WeChat, phone calls, or SMS." After discussion, this was adopted.

(4) An expert indicated that "Understand the patient's basic condition based on their chief complaint" was vague. They suggested clarifying it to assess both physiological and psychological aspects, revising it to "Understand the patient's physiological and psychological status based on their chief complaint." After discussion, this was adopted.

(5) An expert suggested revising "Implementation Personnel: Doctors, nurses, brain-heart health managers, rehabilitation therapists, etc. specializing in stroke or rehabilitation medicine" to "Implementation Personnel: A multidisciplinary rehabilitation team including doctors, nurses, brain-heart health managers, rehabilitation therapists, etc. specializing in stroke or rehabilitation medicine." After discussion, this was adopted.

**Supplementary Material 4:Expert Opinion Convergence Data at the Item Level**

In the first round of the survey, the mean importance ratings for indicators at all levels ranged from 4.33 to 5.00, with standard deviations from 0.00 to 0.64 and coefficients of variation between 0.00 and 0.14, as shown in Table 1. In the second round, the mean importance ratings ranged from 4.60 to 5.00, with standard deviations from 0.00 to 0.52 and coefficients of variation between 0.00 and 0.11, as detailed in Table 2.

**Table 1 First-Round Survey**

| **Item Number** | **Importance Score** | **Coefficient of Variation (CV)** |
| --- | --- | --- |
| 1 | 4.67±0.62 | 0.13 |
| 2 | 4.93±0.26 | 0.05 |
| 3 | 5.00±0.00 | 0.00 |
| 1.1 | 4.53±0.64 | 0.14 |
| 1.2 | 4.93±0.26 | 0.05 |
| 1.3 | 4.73±0.46 | 0.10 |
| 2.1 | 4.93±0.26 | 0.05 |
| 2.2 | 4.73±0.59 | 0.12 |
| 2.3 | 4.87±0.35 | 0.07 |
| 2.4 | 4.93±0.26 | 0.05 |
| 2.5 | 4.93±0.26 | 0.05 |
| 2.6 | 4.93±0.26 | 0.05 |
| 2.7 | 4.67±0.49 | 0.10 |
| 3.1 | 4.93±0.26 | 0.05 |
| 3.2 | 4.80±0.41 | 0.09 |
| 3.3 | 4.73±0.46 | 0.10 |
| 1.1.1 | 4.33±0.62 | 0.14 |
| 1.2.1 | 5.00±0.00 | 0.00 |
| 1.2.2 | 4.93±0.26 | 0.05 |
| 1.2.3 | 4.93±0.26 | 0.05 |
| 1.2.4 | 4.53±0.64 | 0.14 |
| 1.3.1 | 4.87±0.35 | 0.07 |
| 1.3.2 | 4.80±0.41 | 0.09 |
| 2.1.1 | 4.87±0.52 | 0.11 |
| 2.1.2 | 4.93±0.26 | 0.05 |
| 2.2.1 | 4.80±0.56 | 0.12 |
| 2.3.1 | 5.00±0.00 | 0.00 |
| 2.3.2 | 4.93±0.26 | 0.05 |
| 2.4.1 | 5.00±0.00 | 0.00 |
| 2.4.2 | 4.73±0.59 | 0.13 |
| 2.5.1 | 4.93±0.26 | 0.05 |
| 2.5.2 | 5.00±0.00 | 0.00 |
| 2.5.3 | 4.93±0.26 | 0.05 |
| 2.5.4 | 5.00±0.00 | 0.00 |
| 2.5.5 | 4.87±0.52 | 0.11 |
| 2.6.1 | 4.93±0.26 | 0.05 |
| 2.6.2 | 4.87±0.52 | 0.11 |
| 2.6.3 | 4.93±0.26 | 0.05 |
| 2.6.4 | 4.93±0.26 | 0.05 |
| 2.7.1 | 4.87±0.35 | 0.07 |
| 2.7.2 | 4.93±0.26 | 0.05 |
| 2.7.3 | 4.67±0.62 | 0.13 |
| 3.1.1 | 4.93±0.26 | 0.05 |
| 3.1.2 | 4.93±0.26 | 0.05 |
| 3.2.1 | 4.67±0.49 | 0.10 |
| 3.3.1 | 4.80±0.41 | 0.09 |

**Table 2 Second-Round Survey**

| **Item Number** | **Importance Score** | **Coefficient of Variation (CV)** |
| --- | --- | --- |
| 1 | 4.73±0.46 | 0.10 |
| 2 | 5.00±0.00 | 0.00 |
| 3 | 5.00±0.00 | 0.00 |
| 1.1 | 4.67±0.49 | 0.10 |
| 1.2 | 5.00±0.00 | 0.00 |
| 1.3 | 4.73±0.46 | 0.10 |
| 2.1 | 5.00±0.00 | 0.00 |
| 2.2 | 4.80±0.41 | 0.09 |
| 2.3 | 4.87±0.35 | 0.07 |
| 2.4 | 4.93±0.26 | 0.05 |
| 2.5 | 4.93±0.26 | 0.05 |
| 2.6 | 5.00±0.00 | 0.00 |
| 2.7 | 4.73±0.46 | 0.10 |
| 3.1 | 5.00±0.00 | 0.00 |
| 3.2 | 4.93±0.26 | 0.05 |
| 3.3 | 4.80±0.41 | 0.09 |
| 3.4 | 5.00±0.00 | 0.00 |
| 1.1.1 | 4.60±0.51 | 0.11 |
| 1.2.1 | 5.00±0.00 | 0.00 |
| 1.2.2 | 4.93±0.26 | 0.05 |
| 1.2.3 | 4.93±0.26 | 0.05 |
| 1.2.4 | 4.60±0.51 | 0.11 |
| 1.3.1 | 4.86±0.35 | 0.07 |
| 1.3.2 | 4.80±0.41 | 0.09 |
| 2.1.1 | 4.86±0.52 | 0.11 |
| 2.1.2 | 4.93±0.26 | 0.05 |
| 2.2.1 | 4.93±0.26 | 0.05 |
| 2.3.1 | 5.00±0.00 | 0.00 |
| 2.3.2 | 4.93±0.26 | 0.05 |
| 2.4.1 | 5.00±0.00 | 0.00 |
| 2.4.2 | 5.00±0.00 | 0.00 |
| 2.5.1 | 5.00±0.00 | 0.00 |
| 2.5.2 | 5.00±0.00 | 0.00 |
| 2.5.3 | 4.93±0.26 | 0.05 |
| 2.5.4 | 5.00±0.00 | 0.00 |
| 2.5.5 | 4.93±0.26 | 0.05 |
| 2.6.1 | 4.93±0.26 | 0.05 |
| 2.6.2 | 4.93±0.26 | 0.05 |
| 2.6.3 | 4.93±0.26 | 0.05 |
| 2.6.4 | 4.93±0.26 | 0.05 |
| 2.7.1 | 4.87±0.35 | 0.07 |
| 2.7.2 | 4.93±0.26 | 0.05 |
| 2.7.3 | 4.73±0.46 | 0.10 |
| 3.1.1 | 4.93±0.26 | 0.05 |
| 3.1.2 | 4.93±0.26 | 0.05 |
| 3.2.1 | 4.80±0.41 | 0.09 |
| 3.3.1 | 4.87±0.35 | 0.07 |
| 3.4.1 | 4.93±0.26 | 0.05 |
